# Supplementary material for: Physical Activity Regulates TNFα and IL-6 Expression to Counteract Inflammation in Cystic Fibrosis Patients
Source: MDPI journal article supplement (doi:10.3390/ijerph18094691), 2021-04-28
Supplement: s1 [file s1]

**Table S1.** Physical activity program in PA CF group (mean values and standard deviation).

|                         | <b>PA CF<br/>group (n = 42)</b> |
|-------------------------|---------------------------------|
| Weekly frequency (days) | 3.43 (1.33)                     |
| Minutes/session         | 67 (34)                         |
| Minutes/week            | 221 (148)                       |

PA: physical activity
